# Supplementary material
Source: Springer Nature journal article supplement (https://www.springermedizin.de/resource/supplementary/12957_2011_837_MOESM3_ESM.pdf/9565982)

Ident. Nr. :  
Name :

Sex : Alter :  
Geburtsdatum :

14/01/2011  
13:40:24

CVP : 1  
Eri: 4 Cr: N

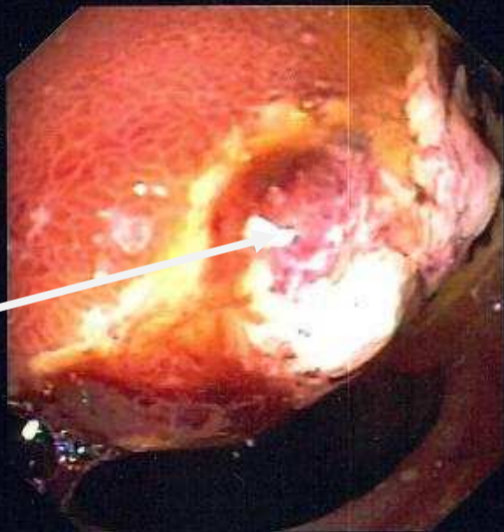

Doktor :  
Kommentar :

Supplement: MOESM3 [file 9565982]
